# Supplementary material for: Ambient conversion of CO2 and epoxides to cyclic carbonates using 3D amide-functionalized MOFs
Source: Royal Society of Chemistry journal article supplement (doi:10.1039/d3cy01709e), 2024-01-01
Supplement: d3cy01709e1.pdf [file d3cy01709e1.pdf]

## Supporting Information

### Ambient Conversion of CO<sub>2</sub> and Epoxides to Cyclic Carbonates Using 3D Amide- Functionalized MOFs

Zafar A. K. Khattak,<sup>ab</sup> Nazir Ahmad,<sup>\*c</sup> Hussein A. Younus,<sup>de</sup> Habib Ullah,<sup>fg</sup> Baoyi Yu,<sup>h</sup>  
Khurram S. Munawar,<sup>i</sup> Muhammad Ashfaq,<sup>j</sup> Muhammad Yaseen,<sup>k</sup> Muhammad Danish,<sup>g</sup>  
Mohammed Al-Abri,<sup>d,l</sup> Rashid AlHajri,<sup>l</sup> and Francis Verpoort,<sup>\*am</sup>

- <sup>a</sup>. State Key Laboratory of Advanced Technology for Materials Synthesis and Processing, Wuhan University of Technology, Wuhan 430070, China.
- <sup>b</sup>. Department of Chemistry, University of Buner, Swari, Buner, Khyber Pakhtunkhwa, Pakistan.
- <sup>c</sup>. Department of Chemistry, GC University, Lahore, Pakistan.
- <sup>d</sup>. Nanotechnology Research Centre, Sultan Qaboos University, PO Box 17, PC 123, SQU, Al-Khoudh, Oman.
- <sup>e</sup>. Chemistry department, Faculty of Science, Fayoum University, Fayoum 63514, Egypt.
- <sup>f</sup>. Department of Materials Science and Engineering, Chungnam National University, Daejeon 34134, Republic of Korea.
- <sup>g</sup>. Department of Chemistry, University of Sialkot, Sialkot 51040 Punjab, Pakistan.
- <sup>h</sup>. Key Laboratory of Urban Agriculture (North China), Ministry of Agriculture, College of Biological Sciences Engineering, Beijing University of Agriculture, Beijing 102206, China.
- <sup>i</sup>. Department of Chemistry, University of Mianwali, Mianwali 42200, Pakistan.
- <sup>j</sup>. Department of Physics, University of Sargodha, Sargodha 40100, Pakistan.
- <sup>k</sup>. Department of Chemistry, Abdul Wali Khan University Mardan, 23200, Pakistan.
- <sup>l</sup>. Department of Chemical and Petroleum Engineering, College of Engineering, Sultan Qaboos University, P.O Box 33, Al Khould, Muscat, PC 123, Oman.
- <sup>m</sup>. National Research Tomsk Polytechnic University, 634050 Tomsk, Russian Federation.
- \* Correspondence: [dr.nazirahmad@gcu.edu.pk](mailto:dr.nazirahmad@gcu.edu.pk) (N.A.); [francis@whut.edu.cn](mailto:francis@whut.edu.cn) (F.V.)

## **Contents**

|                                                             |                         |
|-------------------------------------------------------------|-------------------------|
| <b>1. Tables Related to Single Crystal XRD</b>              | <b>Table S1-S3</b>      |
| <b>2. Single Crystal XRD</b>                                | <b>Figures S1-S3</b>    |
| <b>3. XPS Survey</b>                                        | <b>Figures S4-S5</b>    |
| <b>4. The cycloaddition of epoxides catalysed by TBAB</b>   | <b>Table S4</b>         |
| <b>5. NMR Spectra of Carbon Dioxide Fixation Reactions</b>  | <b>Figures S6-S9</b>    |
| <b>6. Proposed Catalytic Mechanism</b>                      | <b>Scheme S1 and S2</b> |
| <b>7. The carbon dioxide sorption-desorption</b>            | <b>Figure S10</b>       |
| <b>8. FTIR of the as-synthesized and recovered catalyst</b> | <b>Figure S11</b>       |
| <b>9. References</b>                                        |                         |

**Table S1.** SC-XRD Experimental details of ZnMOF.

| <b>Crystal data</b>                                                              | <b>ZnMOF</b>                                                      |
|----------------------------------------------------------------------------------|-------------------------------------------------------------------|
| CCDC                                                                             | 2097251                                                           |
| Chemical formula                                                                 | C <sub>40</sub> H <sub>46</sub> N <sub>6</sub> O <sub>12</sub> Zn |
| $M_r$                                                                            | 868.20                                                            |
| Crystal system, space group                                                      | Monoclinic, <i>C2/c</i>                                           |
| Temperature (K)                                                                  | 296                                                               |
| $a, b, c$ (Å)                                                                    | 13.2667 (11), 13.8534 (12), 22.0429 (19)                          |
| $\alpha, \beta, \gamma$ (°)                                                      | 90, 93.349 (2), 90                                                |
| $V$ (Å <sup>3</sup> )                                                            | 4044.3 (6)                                                        |
| $Z$                                                                              | 4                                                                 |
| Density (calculated)g/cm <sup>-3</sup>                                           | 1.426                                                             |
| F(000)                                                                           | 1816                                                              |
| Radiation type                                                                   | Mo $K\alpha$                                                      |
| Wavelength ( $\lambda$ )                                                         | 0.71073                                                           |
| $\mu$ (mm <sup>-1</sup> )                                                        | 0.678                                                             |
| Crystal size (mm)                                                                | 0.28 × 0.23 × 0.20                                                |
| <b>Data Collection</b>                                                           |                                                                   |
| Diffractometer                                                                   | Bruker APEX-II CCD                                                |
| Absorption correction                                                            | multi-scan                                                        |
| No. of measured,<br>independent and observed<br>[ $I > 2\sigma(I)$ ] reflections | 16769, 4637, 3883                                                 |
| Theta range for data<br>collection (°)                                           | 1.851 to 27.528                                                   |
| $R_{\text{int}}$                                                                 | 0.044                                                             |
| $(\sin \theta/\lambda)_{\text{max}}$ (Å <sup>-1</sup> )                          | 0.650                                                             |
| <b>Data Refinement</b>                                                           |                                                                   |
| $R[F^2 > 2\sigma(F^2)], wR(F^2), S$                                              | 0.038, 0.109, 1.05                                                |
| No. of reflections                                                               | 4637                                                              |
| No. of parameters                                                                | 271                                                               |
| H-atom treatment                                                                 | H-atom parameters constrained                                     |
| $\Delta\rho_{\text{max}}, \Delta\rho_{\text{min}}$ (e Å <sup>-3</sup> )          | 0.36, -0.25                                                       |

**Table S2.** Selected bond lengths (Å) and bond angles (°) in ZnMOF. Symmetry codes are (ii) 1-x, y, 1/2-z; (iv) 1/2+x, -1/2+y, z; (v) 1/2-x, -1/2+y, 1/2-z.

| <b>Bond lengths</b>  |             | <b>Bond angles</b>                     |            |
|----------------------|-------------|----------------------------------------|------------|
| Zn1—O1               | 1.9592 (14) | O <sup>ii</sup> —Zn1—O1                | 99.37 (9)  |
| Zn1—O1 <sup>ii</sup> | 1.9592 (14) | O1 <sup>ii</sup> —Zn1—O4 <sup>iv</sup> | 107.61 (6) |
| Zn1—O4 <sup>iv</sup> | 1.9612 (13) | O1—Zn1—O4 <sup>iv</sup>                | 117.92 (6) |
| Zn1—O4 <sup>v</sup>  | 1.9612 (13) | O1 <sup>ii</sup> —Zn1—O4 <sup>v</sup>  | 117.92 (6) |
| O1—C1                | 1.274 (2)   | O1—Zn1—O4 <sup>v</sup>                 | 107.61 (6) |
| O2—C1                | 1.236 (2)   | O4 <sup>iv</sup> —Zn1—O4 <sup>v</sup>  | 106.88 (9) |

**Table S3.** Hydrogen-bond geometry (Å, °) for ZnMOF.

| $D-H\cdots A$                       | $D-H$ | $H\cdots A$ | $D\cdots A$ | $\angle(D-H\cdots A)^\circ$ |
|-------------------------------------|-------|-------------|-------------|-----------------------------|
| N1—H1 $\cdots$ O6 <sup>vi</sup>     | 0.86  | 2.06        | 2.859 (2)   | 153                         |
| N2—H2A $\cdots$ O5 <sup>i</sup>     | 0.89  | 2.10        | 2.851 (3)   | 142                         |
| N2—H2B $\cdots$ O2 <sup>vii</sup>   | 0.89  | 2.23        | 2.827 (3)   | 124                         |
| N2—H2B $\cdots$ O3                  | 0.89  | 2.37        | 2.962 (3)   | 124                         |
| N2—H2B $\cdots$ O4 <sup>i</sup>     | 0.89  | 2.40        | 2.989 (2)   | 124                         |
| C16—H16A $\cdots$ O3                | 0.96  | 2.50        | 3.062 (4)   | 117                         |
| C17—H17C $\cdots$ O2 <sup>vii</sup> | 0.96  | 2.51        | 3.009 (4)   | 112                         |

**Symmetry codes:** (i)  $-x, y, -z+1/2$ ; (vi)  $-x+1, -y, -z$ ; (vii)  $-x+1/2, y+1/2, -z+1/2$ .

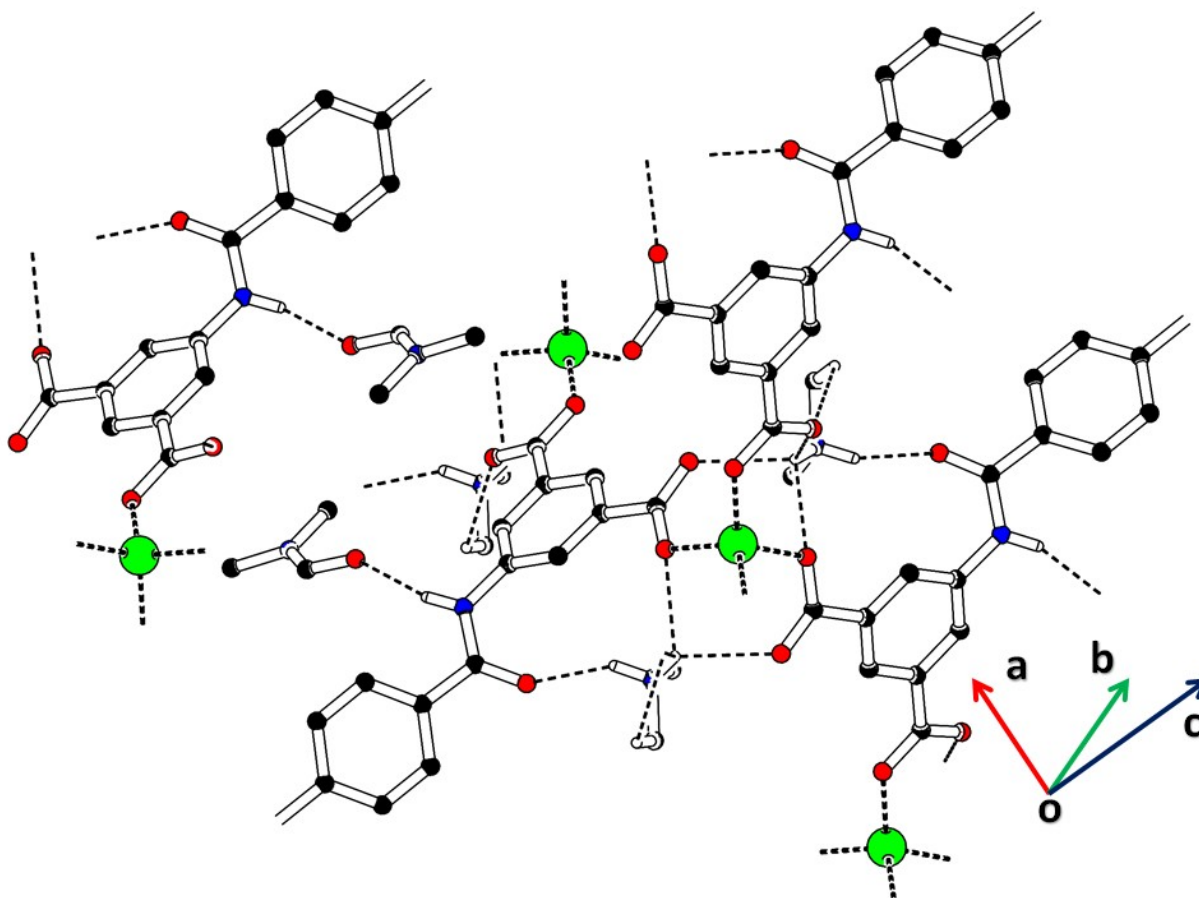

**Figure S1.** Packing diagram of ZnMOF. Only selected H-atoms are shown for clarity.

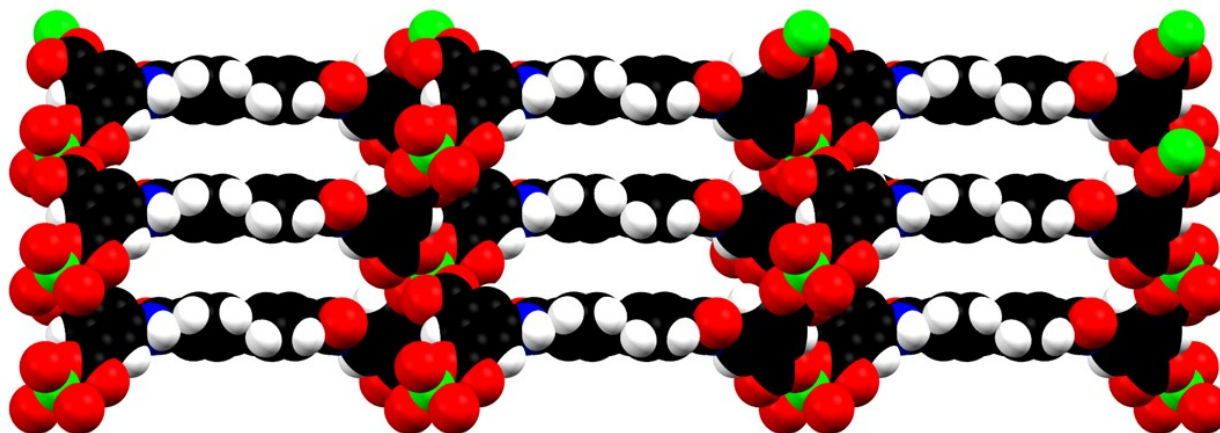

Figure S2. Graphical representation of channels ( $15 \times 7.6$ )  $\text{\AA}^2$  along  $a$ -axis.

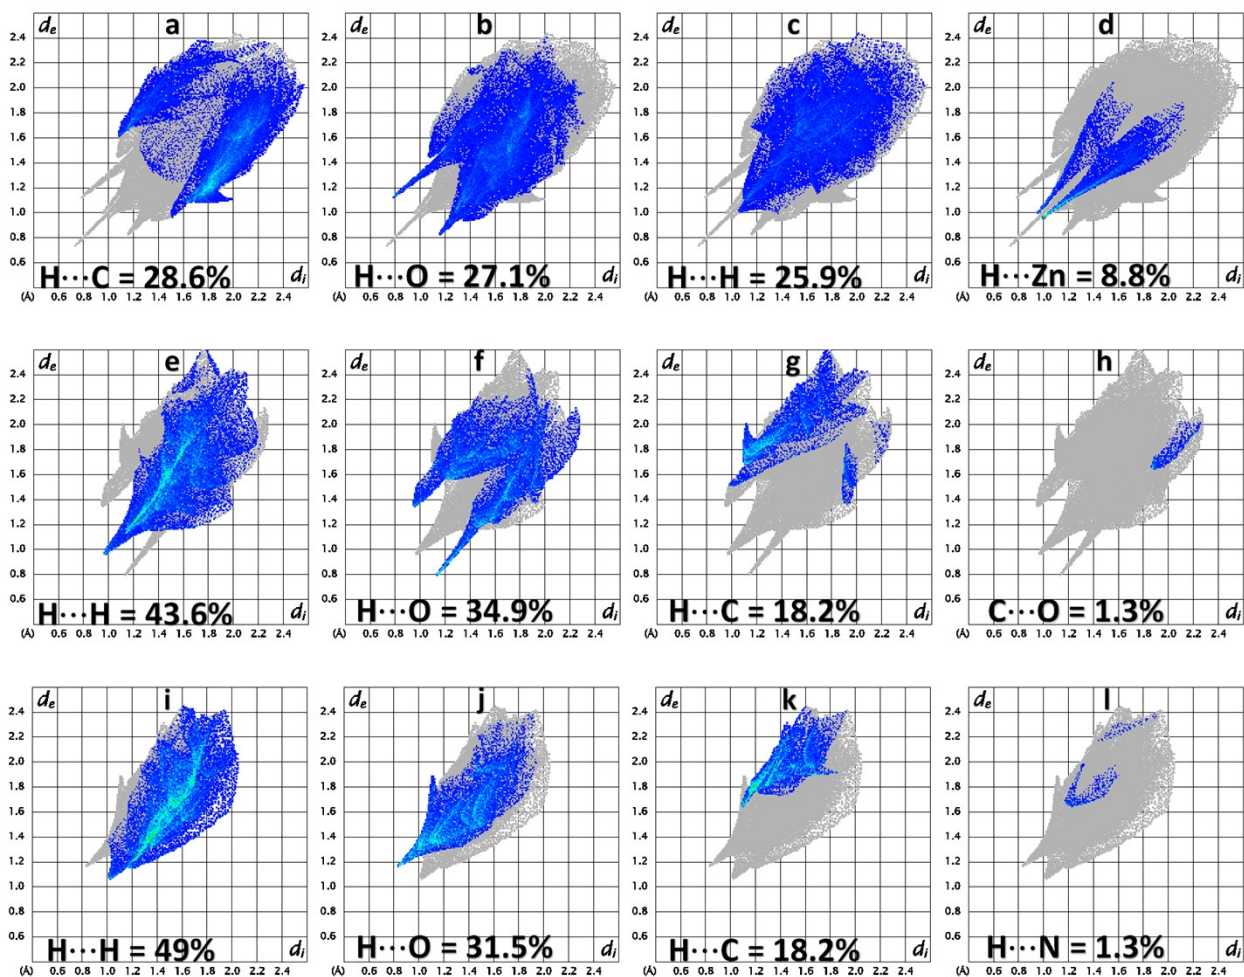

Figure S3. Important 2D fingerprint plots of (a-d) ZnMOF, (e-h) DMF, and (i-l) DHMA.

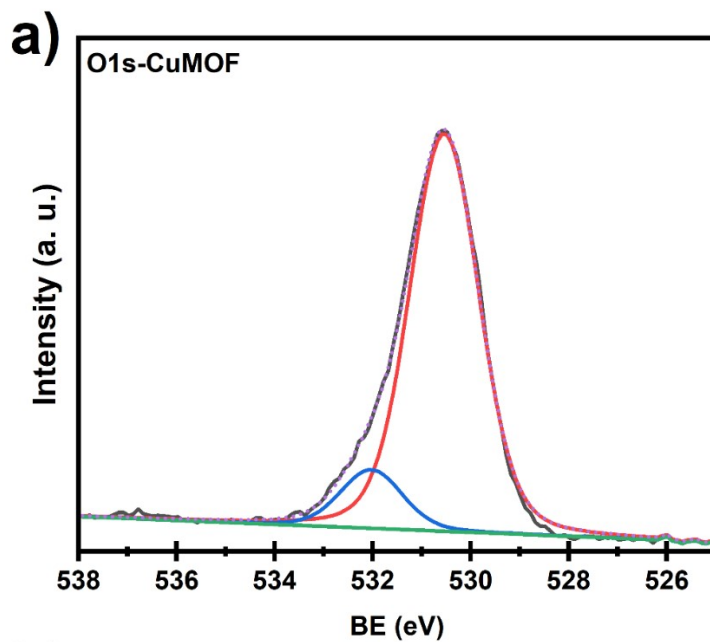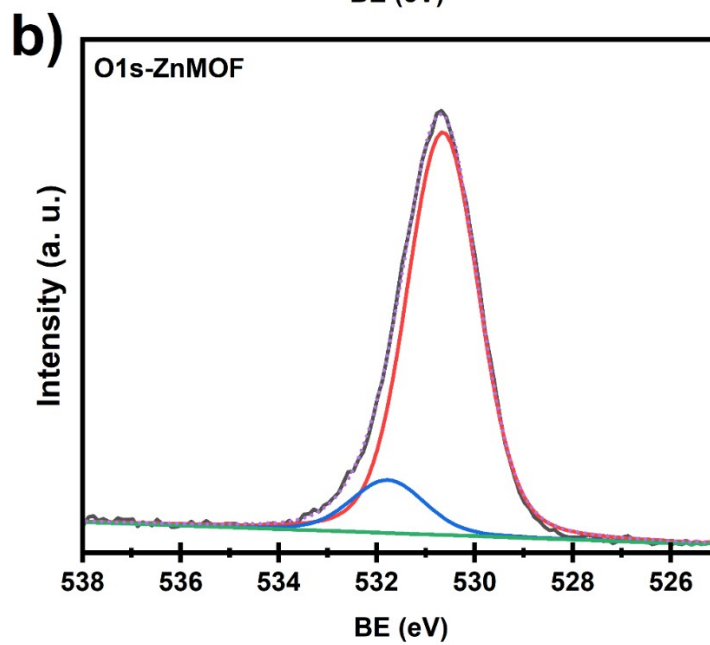

Figure S4. The O 1s XPS spectra of Cu-MOFs (a) and Zn-MOF (b).

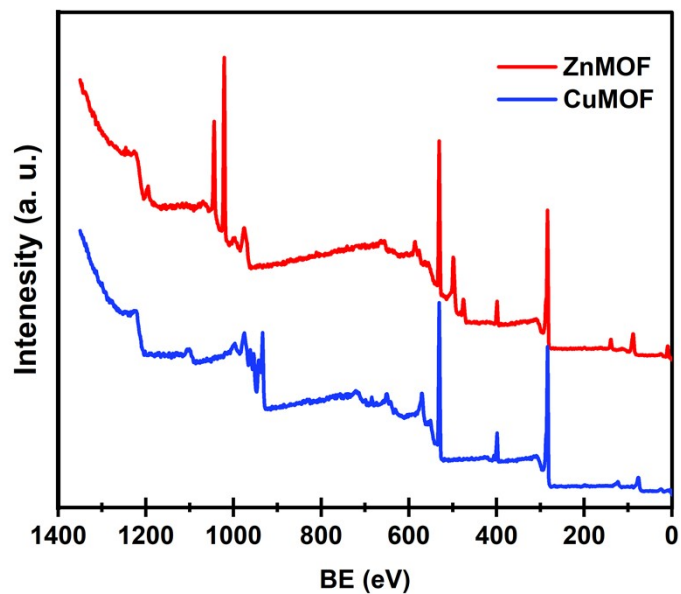

Figure S5. XPS survey of both Cu- and Zn-MOF

**Table S4.** The cycloaddition of epoxides and CO<sub>2</sub> from the literature catalysed by TBAB.

| Catalyst/TBAB<br>(mmol) | Substrate | Substrate<br>Loading<br>(mmol) | Reaction Conditions |            |          | Conversion<br>(%) | TON | TOF | Ref. |
|-------------------------|-----------|--------------------------------|---------------------|------------|----------|-------------------|-----|-----|------|
|                         |           |                                | T<br>(°C)           | P<br>(bar) | t<br>(h) |                   |     |     |      |
| 0.5                     | PO        | 25                             | 40                  | 20         | 24       | 13                | -   | -   | 1    |
| 2.5mol%                 | SO        | 17.4                           | 80                  | 10         | 12       | 02                | -   | -   | 2    |
| 0.01                    | ECH       | 10                             | 120                 | 1          | 3        | 39                | 390 | 130 | 3    |

SO = Styrene oxide; ECH = Epichlorohydrin, PO = Propylene oxide

## NMR Spectra of Carbon Dioxide Fixation Reactions

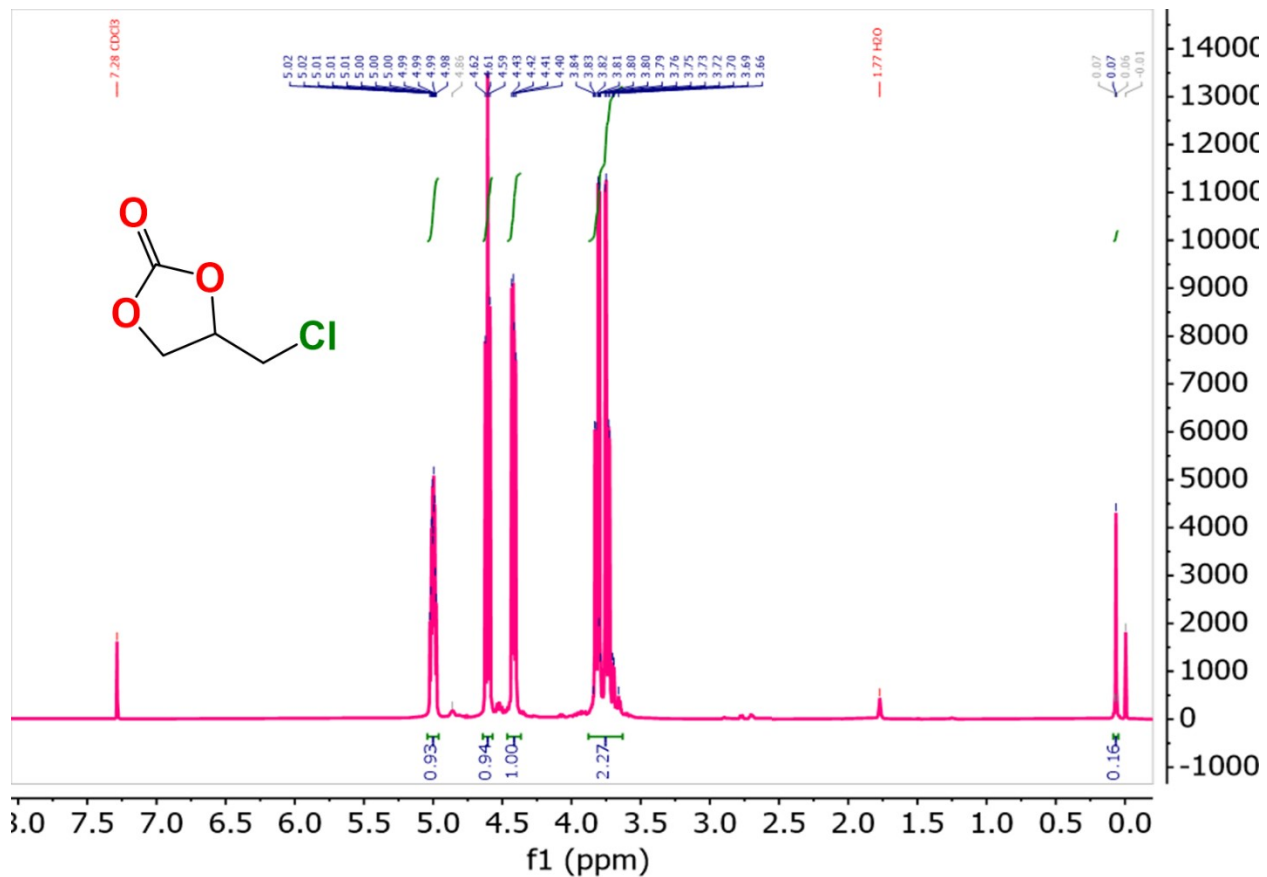

**Figure S6:** <sup>1</sup>H-NMR spectrum in CDCl<sub>3</sub> of the reaction mixture obtained from the conversion of epichlorohydrin.



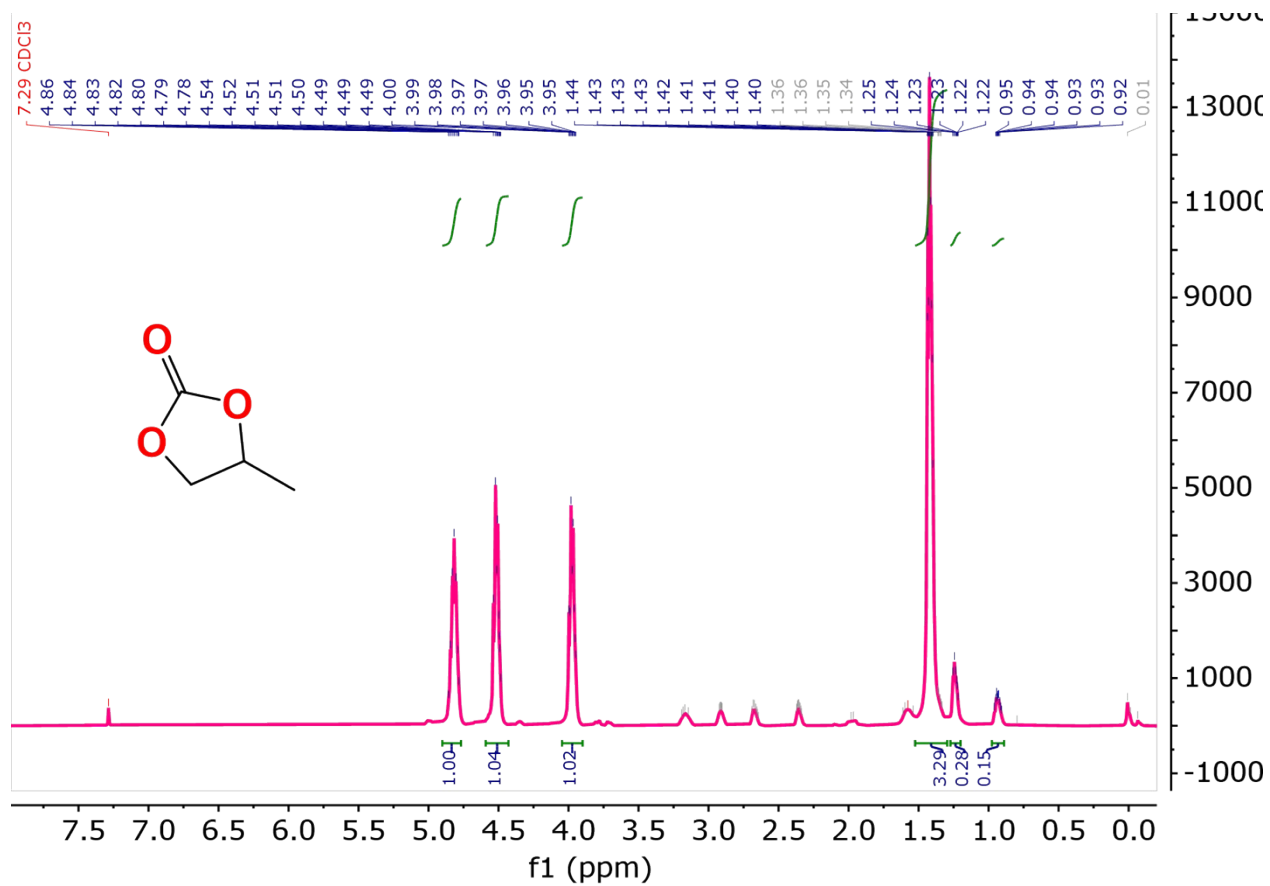

**Figure S7:**  $^1\text{H-NMR}$  spectrum in  $\text{CDCl}_3$  of the reaction mixture obtained from the conversion of propylene oxide.

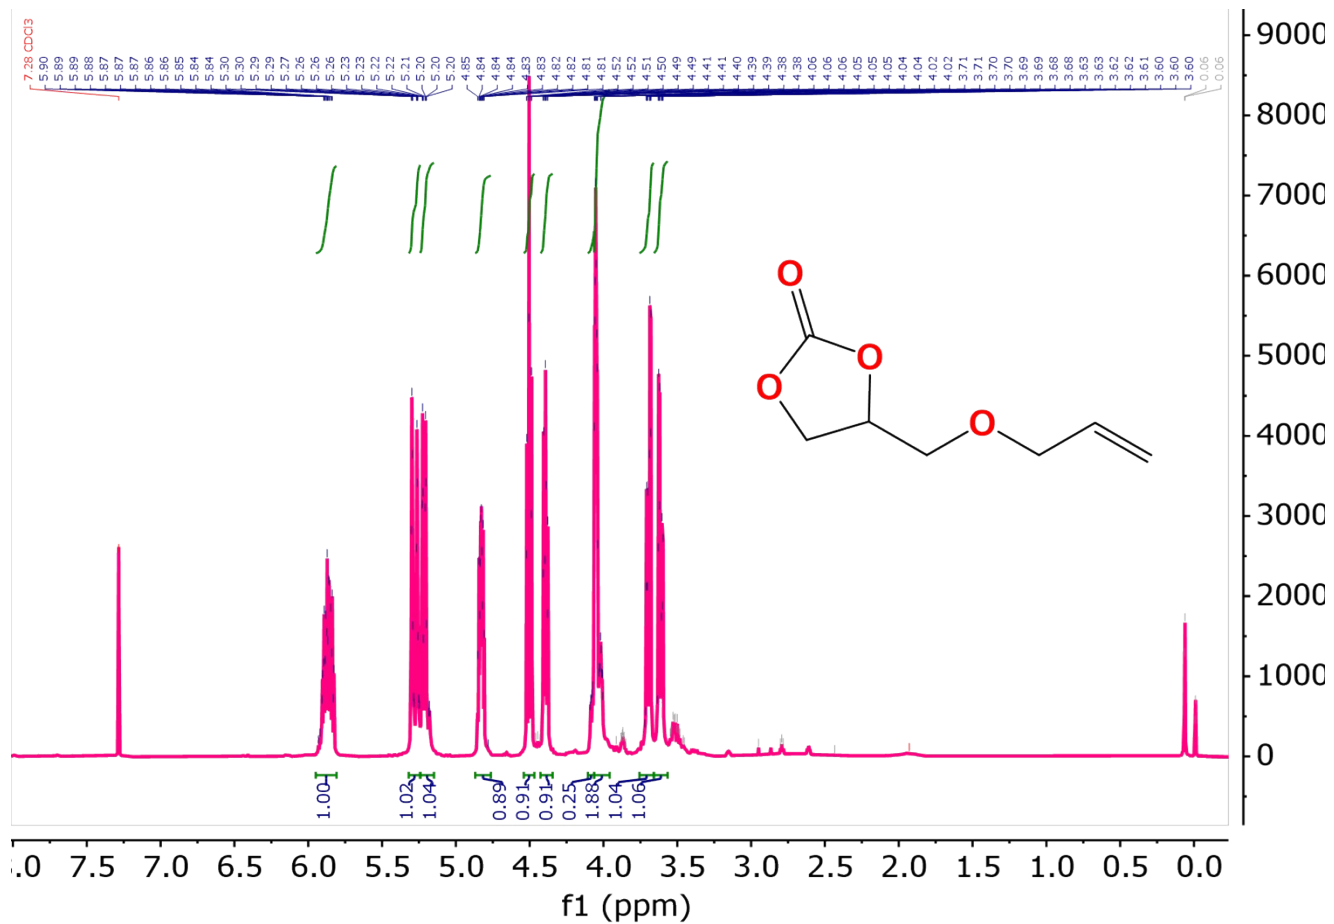

**Figure S8:** <sup>1</sup>H-NMR spectrum in CDCl<sub>3</sub> of the reaction mixture obtained from the conversion of allyl glycidyl ether

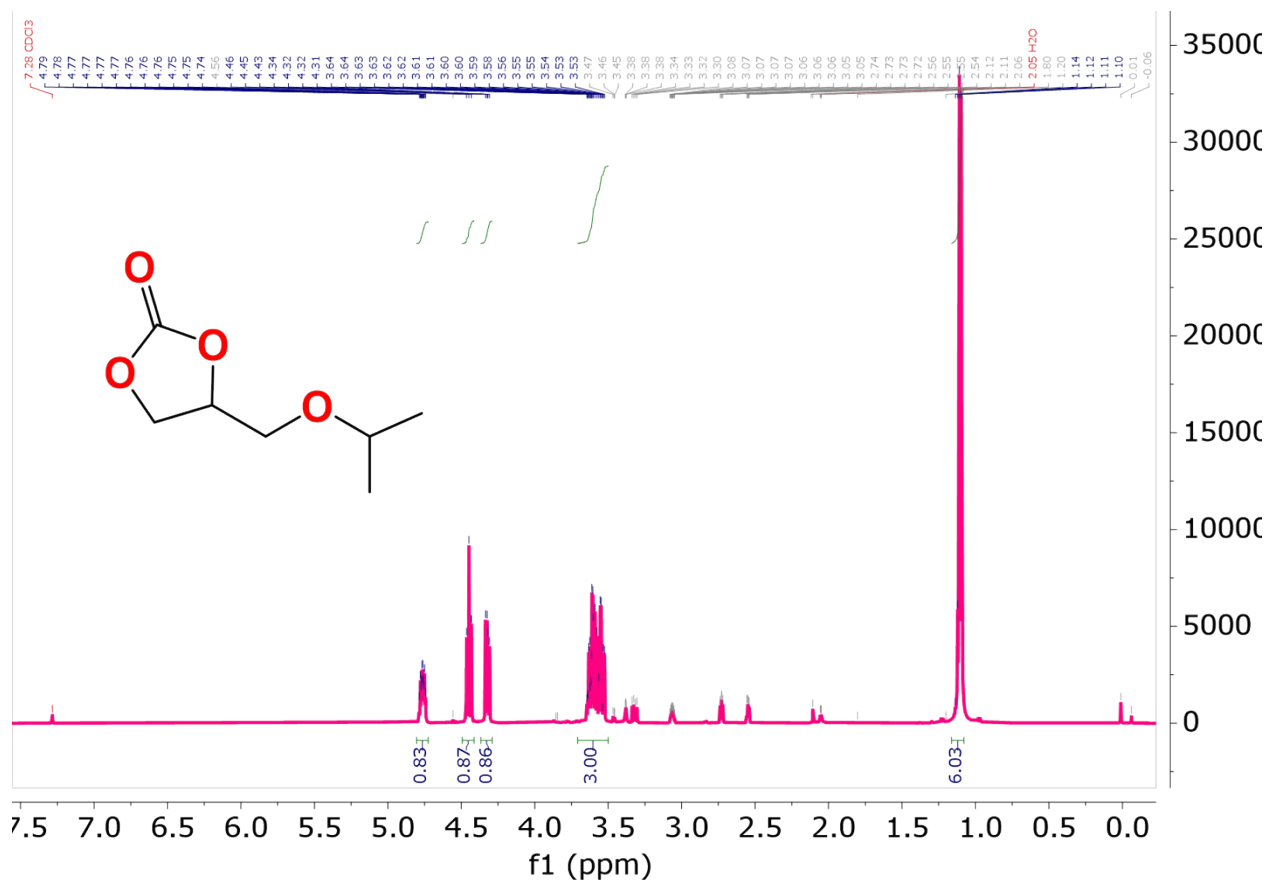

**Figure S9:** <sup>1</sup>H-NMR spectrum in CDCl<sub>3</sub> of the reaction mixture obtained from the conversion of glycidyl isopropyl ether.

### The proposed mechanism in the absence of TBAB

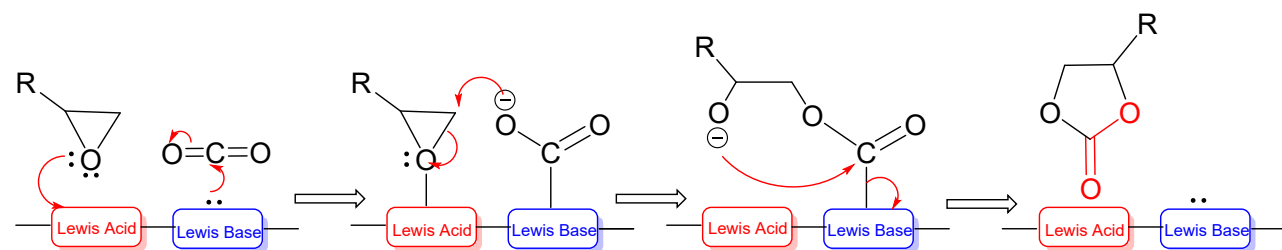

**Scheme S1.** Catalytic mechanism involving Lewis Acid and Lewis Base sites of the MOF for the cycloaddition of CO<sub>2</sub> to epoxide.

### The proposed mechanism in the presence of TBAB

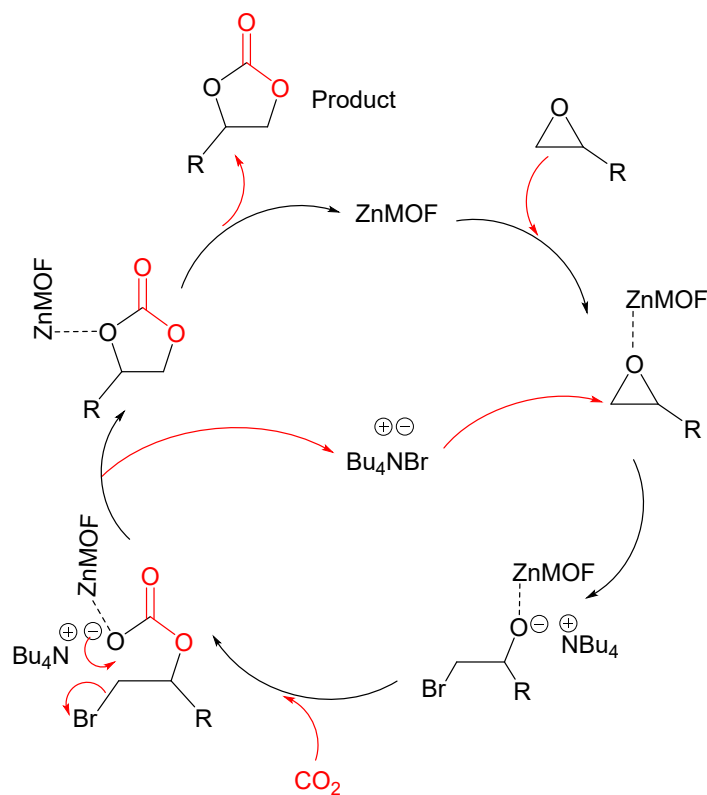

**Scheme S2.** Catalytic mechanism involving MOF and cocatalyst TBAB for the cycloaddition of CO<sub>2</sub> to epoxide.

### The carbon dioxide sorption-desorption

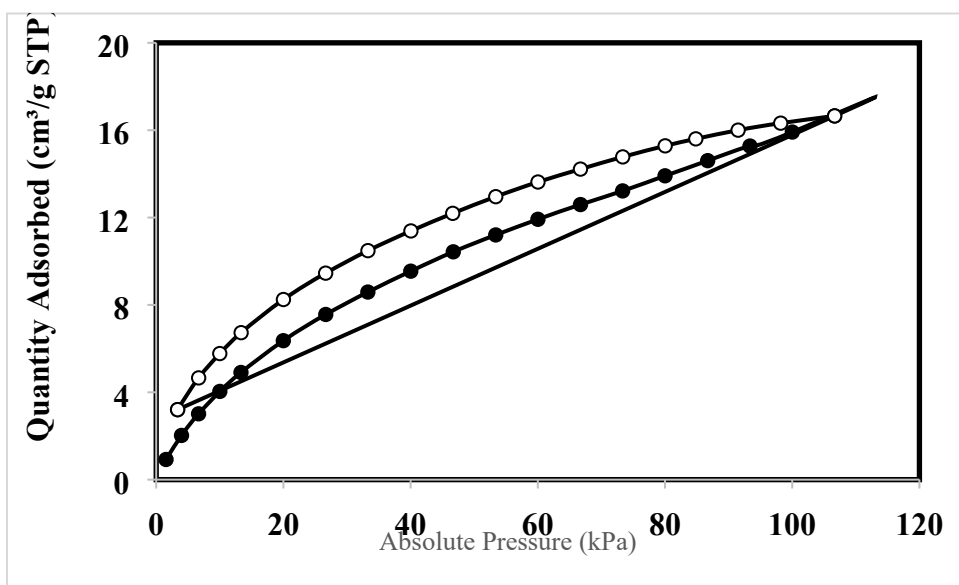

**Figure S10:** CO<sub>2</sub> sorption (black-colored filled circles)-desorption (empty circles) at 273

K.

### The FTIR of the as-synthesized and recovered catalyst

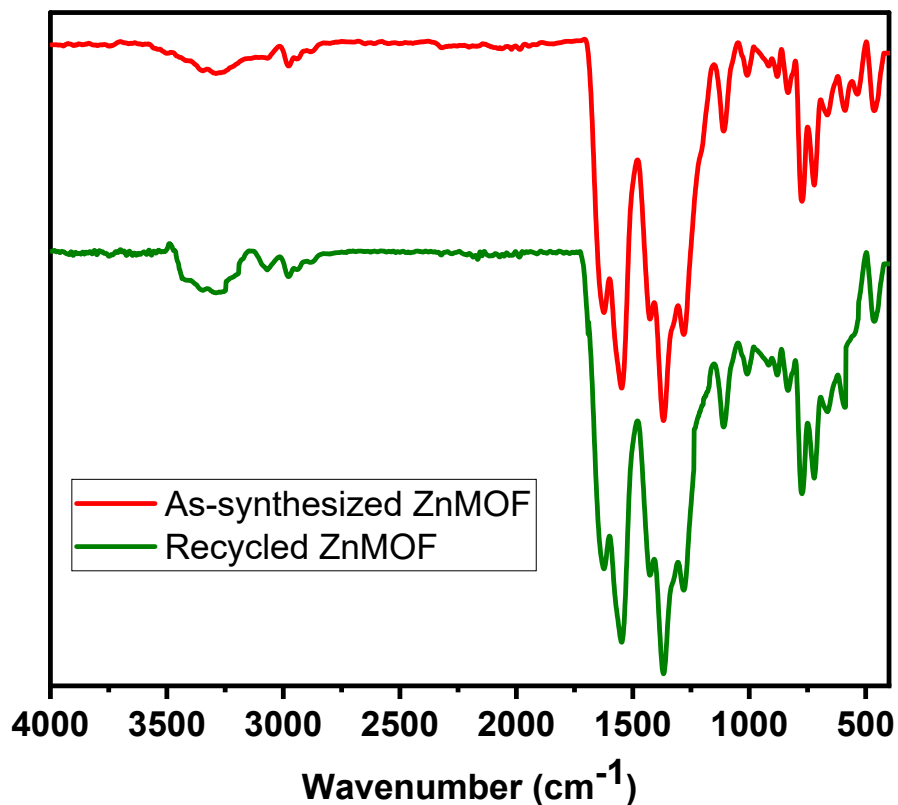

**Figure S11:** The FTIR of the as-synthesized and recycled (after 5th catalytic run) of ZnMOF

### References

1. L. Xu, M.-K. Zhai, X.-C. Lu and H.-B. Du, *Dalton Trans.*, 2016, 45, 18730-18736.
2. U. Patel, P. Patel, B. Parmar, A. Dadhania and E. Suresh, *Crystal Growth & Design*, 2021, 21, 1833-1842.
3. S. Suleman, H. A. Younus, N. Ahmad, Z. A. K. Khattak, H. Ullah, J. Park, T. Han, B. Yu and F. Verpoort, *Appl. Catal. A: Gen.*, 2020, 591, 117384.
